# Supplementary material for: New analysis for consistency among markers in the study of genetic diversity: development and application to the description of bacterial diversity
Source: PubMed Central journal article supplement (PMC2082430; doi:10.1186/1471-2148-7-156), 2007-09-03
Supplement: 1471-2148-7-156-S3.pdf [file 1471-2148-7-156-S3.pdf]

## **Additional file 2 - Description of the complete sampling procedure for the real data set**

One liter of top soil was sampled at Sainte Colombe l'Eglise in the south of France (longitude 02°45'26" East – latitude 42°37'59" North). The soil sample was put into contact with individuals of *M. truncatula*. Two one liter samples of top soil were obtained from two localities in Tunisia which are included in a semi-arid bioclimatic area: Enfidha (longitude 10°23' East – latitude 36°07' North) and Hadjeb (longitude 9°33' East – latitude 35°24' North). Two plant species were used to sample rhizobia *ex situ* from each of these Tunisian soils: i) 40 individuals of *M. truncatula* (Jemalong A17 line), ii) 20 individuals of *M. laciniata* (bulk of genotypes). We selected from the whole data set bacterial genotypes which were fully assessed for the four loci.

### ***Isolation and culture of bacteria***

The soil sample was mechanically homogenized before the experiment and aliquots were put into contact with seed germinations. Gibson tubes were previously nine-tenth filled with vermiculite and 25 ml of nitrogen-free plant nutrient solution. Tubes were autoclaved, and then completed with a soil aliquot. Seeds were surface sterilized with calcium hypochlorite 5% (weight/volume) for 5 minutes and rinsed with sterile water. Seeds were germinated for 72 hours on 1% (w/v) agar medium. Each plant was transferred individually into a Gibson tube which was placed in a growth chamber at 22°C day / 18°C night, with a 16-hour photoperiod and 50-60% relative humidity. After two months, symbiotic effectiveness was estimated by visual observation of plant vigor, foliage and nodule color, and all nodules from each plant were harvested. One or two nodules per plant were sterilized using hypochlorite 1% (w/v) for three minutes, then rinsed three times in sterile water. The isolation of one bacterial strain per nodule was performed using three successive sub-cultures on YEMA (yeast extract manitol agar) solid medium of an isolated colony starting from crushed nodules.

Bacterial strains were preserved at -80°C in YEM medium supplemented with a half volume of 60% (volume/volume) glycerol. Each bacterial isolate was then grown in 20 ml YEM medium.

### ***DNA extraction and Sequencing***

Sequences of PCR/sequencing primers are provided in Table 1.

Table 1. Primers used in this study

| Genome location <sup>a</sup>                               | Primers      | Sequence 5'→3'          | T <sub>m</sub> (°C) | PCR product size (bp) |
|------------------------------------------------------------|--------------|-------------------------|---------------------|-----------------------|
| <i>IGS<sub>RKP</sub></i> ( <i>rkpA</i> – <i>rkpU</i> )     | RKP1         | AGGCATGCACGCCCTATGA     | 58.8                | 599                   |
|                                                            | RKP2         | GCCATCGACATCTACAATATCAA | 57.1                |                       |
| <i>IGS<sub>NOD</sub></i> ( <i>nodE</i> – <i>nodG</i> )     | NOD1         | CAGTTCTGGCATTCAAGC      | 53.7                | 579                   |
|                                                            | NOD2         | CCCCTCCTATGGCTCCTGAT    | 61.4                |                       |
| <i>IGS<sub>GAB</sub></i> ( <i>gabD5</i> – <i>SmaI850</i> ) | GAB1         | CATGACCAAAGACCGCTTCC    | 59.4                | 658                   |
|                                                            | GAB2         | GCATGATCGGCCTCAACAC     | 58.8                |                       |
| <i>IGS<sub>EXO</sub></i> ( <i>exoP</i> – <i>thiD</i> )     | EXOmeliloti1 | CAACAAGACGGATATGAACGAA  | 56.5                | 494                   |
|                                                            | EXOmeliloti2 | GTGGTGGAAGGATTGACTGC    | 59.4                |                       |
|                                                            | EXOmedicae1  | CATGAACGAGCTGGGCAAAAT   | 57.3                | 250                   |
|                                                            | EXOmedicae2  | CTGGTCGAAGCGGCAAAA      | 56.0                |                       |

<sup>a</sup> Genome locations refer to the genome of *S. meliloti* strain 1021

One milliliter of liquid culture was washed twice in an Eppendorf micro-tube by centrifugation (15000 g, 4 min) and the pellet re-suspended in 750 µl of sterile water. One hundred microliters of this solution was incubated for two hours with 20 µl of 1 mg.ml<sup>-1</sup> proteinase K and 100 µl of tris-HCl (10 mM, pH 8.3). After boiling, this mixture was used as the DNA matrix. DNA amplification was performed using a Perkin-Elmer 2400 thermocycler in 25 µl volume, including 1 µl of DNA matrix, 200 µM of each dNTP, 0.8 µM of each primer, 1.5 mM of MgCl<sub>2</sub>, 1X buffer supplied by the *Taq* polymerase manufacturer, and 1.25 U of Invitrogen *Taq* polymerase. We used a touch-down program including an initial denaturation stage (96°C, 4 min), 20 cycles of denaturation (96°C, 30 s), annealing (annealing temperature decrease steadily from 60°C to 50°C in 20 cycles, 30 s), elongation (72°C, 1 min)

and 20 cycles of denaturation (96°C, 30 s), annealing (50°C, 30 s) and elongation (72°C, 1 min). PCR products were cut out from a 1% (w/v) agarose electrophoresis gel, purified with a QIAquick Gel extraction kit (Qiagen) and sequenced on one strand. For French samples, sequencing reactions were performed using the ABI Prism BigDye Terminator Cycle sequence Kit (Applied Biosystem) and analyzed on an Applied Biosystem model 310 DNA sequencer. For Tunisian populations sequencing reactions were performed using the DYEnamic ET Terminator Kit (Amersham Bioscience) and analyzed on an Amersham Bioscience model Megabase 1000 DNA sequencer.

***Nucleotides sequence accession numbers***

All sequences have been deposited in the GenBank data base.

Table 2. Accession numbers

|                          | French samples                          | Tunisian samples   |
|--------------------------|-----------------------------------------|--------------------|
| <i>IGS<sub>NOD</sub></i> | DQ405403–DQ405466,<br>DQ405593–DQ405641 | DQ405467-DQ405592  |
| <i>IGS<sub>EXO</sub></i> | DQ405994–DQ406103                       | DQ406104- DQ406229 |
| <i>IGS<sub>GAB</sub></i> | DQ406342–DQ406392,<br>DQ406519–DQ406567 | DQ406393- DQ406518 |
| <i>IGS<sub>RKP</sub></i> | DQ405768–DQ405882                       | DQ405642- DQ405767 |

***Population diversity***

For each loci, four parameters of population diversity are given: allele richness, gene diversity, the average distance among alleles, and the observed nucleotide diversity scaled by the maximum value given the set of alleles [1, 2].

Table 3. Population diversity

| <i>IGS<sub>NOD</sub></i> | Richness | Gene diversity | Average distance | Nucleotide diversity |
|--------------------------|----------|----------------|------------------|----------------------|
| FTmdc                    | 5        | 0.493          | 0.00187          | 0.00027              |
| TETmdc                   | 3        | 0.565          | 0.00222          | 0.00481              |
| FTmlt                    | 6        | 0.559          | 0.00679          | 0.00297              |
| TETmlt                   | 4        | 0.490          | 0.00288          | 0.00051              |
| THTmlt                   | 7        | 0.571          | 0.00393          | 0.00306              |
| TELmlt                   | 8        | 0.830          | 0.01830          | 0.05009              |
| THLmlt                   | 7        | 0.730          | 0.01703          | 0.03742              |

| <i>IGS<sub>EXO</sub></i> | Richness | Gene diversity | Average distance | Nucleotide diversity |
|--------------------------|----------|----------------|------------------|----------------------|
| FTmdc                    | 6        | 0.677          | 0.00817          | 0.01106              |
| TETmdc                   | 7        | 0.795          | 0.00634          | 0.01141              |
| FTmlt                    | 2        | 0.487          | 0.03575          | 0.06183              |
| TETmlt                   | 3        | 0.392          | 0.02385          | 0.04153              |
| THTmlt                   | 3        | 0.346          | 0.02385          | 0.03899              |
| TELmlt                   | 3        | 0.185          | 0.02675          | 0.01244              |
| THLmlt                   | 2        | 0.255          | 0.03575          | 0.03239              |

| <i>IGS<sub>GAB</sub></i> | Richness | Gene diversity | Average distance | Nucleotide diversity |
|--------------------------|----------|----------------|------------------|----------------------|
| FTmdc                    | 3        | 0.572          | 0.00210          | 0.00746              |
| TETmdc                   | 7        | 0.765          | 0.00566          | 0.03339              |
| FTmlt                    | 7        | 0.432          | 0.01033          | 0.03883              |
| TETmlt                   | 9        | 0.806          | 0.01343          | 0.09763              |
| THTmlt                   | 8        | 0.749          | 0.00953          | 0.06973              |
| TELmlt                   | 5        | 0.690          | 0.01098          | 0.07279              |
| THLmlt                   | 5        | 0.720          | 0.01027          | 0.05087              |

| <i>IGS<sub>RKP</sub></i> | Richness | Gene diversity | Average distance | Nucleotide diversity |
|--------------------------|----------|----------------|------------------|----------------------|
| FTmdc                    | 1        | 0.000          | 0.00000          | 0.00000              |
| TETmdc                   | 1        | 0.000          | 0.00000          | 0.00000              |
| FTmlt                    | 3        | 0.522          | 0.00447          | 0.00789              |
| TETmlt                   | 4        | 0.462          | 0.00669          | 0.01711              |
| THTmlt                   | 6        | 0.475          | 0.00671          | 0.01520              |
| TELmlt                   | 3        | 0.265          | 0.00670          | 0.01845              |
| THLmlt                   | 2        | 0.375          | 0.01006          | 0.03085              |

## ***References***

1. Champely S, Chessel D: **Measuring biological diversity using Euclidean metrics.** *Environ Ecol Stat* 2002, **9**:167-177.
2. Pavoine S, Ollier S, Pontier D: **Measuring diversity from dissimilarities with Rao's quadratic entropy: are any dissimilarity indices suitable?** *Theor Popul Biol* 2005, **67**(4):231-239.
